# Supplementary material for: Identification of potential blood biomarkers associated with suicide in major depressive disorder
Source: PubMed Central journal article supplement (PMC9010430; doi:10.1038/s41398-022-01918-w), 2022-04-14
Supplement: 41398_2022_1918_MOESM1_ESM.pdf [file 41398_2022_1918_MOESM1_ESM.pdf]

**Supplementary Information for:**

**Identification of Potential Blood Biomarkers Associated with Suicide in Major Depressive Disorder**

Firoza Mamdani Ph.D<sup>1</sup>, Matthieu D. Weber B.Sc.<sup>1</sup>, Blynn Bunney Ph.D<sup>1</sup>, Kathleen Burke<sup>1</sup>, Preston Cartagena Ph.D<sup>1</sup>, David Walsh Ph.D<sup>1</sup>, Francis S. Lee M.D., Ph.D<sup>2</sup>, Jack Barchas M.D.<sup>2</sup>, Alan F. Schatzberg M.D.<sup>3</sup>, Richard Myers Ph.D<sup>4</sup>, Stanley J. Watson M.D., Ph.D<sup>5</sup>, Huda Akil Ph.D<sup>5</sup>, Marquis P. Vawter Ph.D<sup>1</sup>, William E. Bunney M.D.<sup>1</sup>, Adolfo Sequeira Ph.D<sup>1\*</sup>

1. Psychiatry and Human Behavior, University of California, Irvine, Irvine, CA, USA
2. Department of Psychiatry, Weill Cornell Medical College, New York, NY, USA
3. Department of Psychiatry and Behavioral Sciences, Stanford University, Palo Alto, CA, USA
4. Hudson Alpha Institute for Biotechnology, Huntsville, AL, USA
5. Molecular & Behavioral Neuroscience Institute, University of Michigan, Ann Arbor, MI, USA

**Supplementary Table 1: Demographic details of the study cohort**

| Tissue          | Gender | Age   | Status    | Race             | pH   | Blood | DLPFC    | Manner of Death                    |
|-----------------|--------|-------|-----------|------------------|------|-------|----------|------------------------------------|
| Blood and Brain | F      | 65    | Control   | Caucasian        | 6.49 | x     | x        | Pulmonary Embolism                 |
|                 | M      | 49    | Control   | Caucasian        | 6.5  | x     | x        | Coronary Artery Disease            |
|                 | M      | 53    | Control   | Hispanic         | 6.55 | x     | x        | Severe Hypertrophic Cardiomyopathy |
|                 | M      | 62    | Control   | Pacific Islander | 6.36 | x     | x        | Coronary Atherosclerosis           |
|                 | M      | 27    | Control   | Caucasian        | 6.55 | x     | x        | Accident                           |
|                 | F      | 32    | Control   | Caucasian        | 6.01 | x     | x        | Undetermined - Natural Causes      |
|                 | M      | 21    | Control   | African American | 6.2  | x     | x        | Pulmonary Embolism                 |
|                 | M      | 45    | Control   | Caucasian        | 6.49 | x     | x        | Dilated Cardiomyopathy             |
|                 | M      | 65    | Control   | Caucasian        | 6.41 | x     | x        | Coronary Atherosclerosis           |
|                 | M      | 40    | Control   | Caucasian        | 6.45 | x     | x        | Accident                           |
|                 | M      | 36    | Control   | Caucasian        | 6.19 | x     | x        | Coronary Atherosclerosis           |
|                 | M      | 33    | Control   | Caucasian        | 6.35 | x     | x        | Cardiomyopathy                     |
|                 | M      | 38    | Control   | Caucasian        | 6.53 | x     | x        | Cardiomyopathy                     |
|                 | F      | 38    | Control   | Asian            | 6.71 | x     | x        | Aortic Dissection                  |
|                 | M      | 49    | MDD-NS    | Caucasian        | 6.66 | x     | x        | Cardiovascular Disease             |
|                 | F      | 52    | MDD-NS    | Caucasian        | 6.65 | x     | x        | Acute Pancreatitis                 |
|                 | M      | 47    | MDD-NS    | Caucasian        | 6.98 | x     | x        | Cardiomyopathy                     |
|                 | M      | 44    | MDD-NS    | Caucasian        | 6.87 | x     | x        | Coronary Atherosclerosis           |
|                 | M      | 38    | MDD-NS    | Caucasian        | 6.72 | x     | x        | Acute Pancreatitis                 |
|                 | F      | 81    | MDD-NS    | Caucasian        | 6.31 | x     | x        | Long-term medical condition        |
|                 | F      | 59    | MDD-NS    | Hispanic         | 6.4  | x     | x        | Long-term medical condition        |
|                 | M      | 58    | MDD-NS    | Caucasian        | 6.79 | x     | x        | Cardiovascular Disease             |
|                 | M      | 44    | MDD-NS    | Caucasian        | 6.66 | x     | x        | Accident                           |
|                 | M      | 56    | MDD-NS    | Caucasian        | 6.58 | x     | x        | Pneumonia                          |
|                 | M      | 50    | MDD-NS    | Caucasian        | 6.41 | x     | x        | Aortic Dissection                  |
|                 | F      | 48    | MDD-NS    | Caucasian        | 6.02 | x     | x        | Accident                           |
|                 | F      | 41    | MDD-NS    | Caucasian        | 6.42 | x     | x        | Long-term medical condition        |
|                 | F      | 51    | MDD-NS    | Caucasian        | 6.37 | x     | x        | Long-term medical condition        |
|                 | F      | 57    | MDD-NS    | Caucasian        | 6.18 | x     | x        | Heart Attack                       |
|                 | M      | 60    | MDD-NS    | Caucasian        | 6.4  | x     | x        | Aneurysm                           |
|                 | M      | 62    | MDD-NS    | Caucasian        | 6.34 | x     | x        | Strangulated Umbilical Hernia      |
|                 | M      | 60    | MDD-S     | Asian            | 6.8  | x     | x        | Hanging                            |
|                 | M      | 50    | MDD-S     | Caucasian        | 6.97 | x     | x        | Hanging                            |
|                 | M      | 60    | MDD-S     | Caucasian        | 6.69 | x     | x        | Hanging                            |
|                 | F      | 19    | MDD-S     | Hispanic         | 6.66 | x     | x        | Hanging                            |
|                 | F      | 43    | MDD-S     | Caucasian        | 6.52 | x     | x        | Stab Wound                         |
|                 | M      | 33    | MDD-S     | Asian            | 6.62 | x     | x        | Carbon Monoxide                    |
|                 | M      | 55    | MDD-S     | Caucasian        | 6.52 | x     | x        | Gunshot Wound                      |
|                 | M      | 25    | MDD-S     | Caucasian        | 6.23 | x     | x        | Hanging                            |
|                 | F      | 39    | MDD-S     | Caucasian        | 6.81 | x     | x        | Hanging                            |
| F               | 21     | MDD-S | Hispanic  | 6.25             | x    | x     | Hanging  |                                    |
| M               | 27     | MDD-S | Caucasian | 6.46             | x    | x     | Hanging  |                                    |
| M               | 50     | MDD-S | Caucasian | 6.79             | x    | x     | Hanging  |                                    |
| F               | 31     | MDD-S | Caucasian | 6.62             | x    | x     | Suicide  |                                    |
| F               | 38     | MDD-S | Caucasian | 6.16             | x    | x     | Overdose |                                    |

**Supplementary Table 1 Continued:**

| Tissue | Gender | Age   | Status    | Race             | pH   | Blood | DLPFC   | Manner of Death                  |
|--------|--------|-------|-----------|------------------|------|-------|---------|----------------------------------|
| Brain  | F      | 55    | Control   | Caucasian        | 6.71 |       | x       | Sudden medical condition         |
|        | M      | 63    | Control   | Caucasian        | 6.58 |       | x       | Sudden medical condition         |
|        | M      | 30    | Control   | Hispanic         | 6.71 |       | x       | Sudden medical condition         |
|        | M      | 54    | Control   | Caucasian        | 6.39 |       | x       | Sudden medical condition         |
|        | M      | 51    | Control   | Caucasian        | 6.94 |       | x       | Sudden medical condition         |
|        | M      | 55    | Control   | Caucasian        | 6.74 |       | x       | Sudden medical condition         |
|        | M      | 55    | Control   | Caucasian        | 6.18 |       | x       | Accident                         |
|        | F      | 18    | MDD-NS    | Caucasian        | 6.31 |       | x       | Sudden medical condition         |
|        | F      | 64    | MDD-NS    | Caucasian        | 6.89 |       | x       | Sudden medical condition         |
|        | F      | 44    | MDD-NS    | Caucasian        | 6.31 |       | x       | Sudden medical condition         |
|        | M      | 50    | MDD-NS    | Caucasian        | 6.42 |       | x       | Sudden medical condition         |
|        | F      | 57    | MDD-NS    | Caucasian        | 6.75 |       | x       | Undetermined/Accidental overdose |
|        | F      | 49    | MDD-NS    | Caucasian        | 6.6  |       | x       | Undetermined/Accidental overdose |
|        | F      | 41    | MDD-NS    | Caucasian        | 6.7  |       | x       | Accident                         |
|        | M      | 48    | MDD-S     | Caucasian        | 6.81 |       | x       | Suicide                          |
|        | M      | 33    | MDD-S     | Caucasian        | 6.87 |       | x       | Suicide                          |
|        | F      | 77    | MDD-S     | Asian            | 6.67 |       | x       | Suicide                          |
| F      | 19     | MDD-S | Caucasian | 6.7              |      | x     | Suicide |                                  |
| F      | 42     | MDD-S | Caucasian | 6.69             |      | x     | Suicide |                                  |
| F      | 40     | MDD-S | Caucasian | 6.47             |      | x     | Suicide |                                  |
| Blood  | F      | 42    | Control   | African American |      | x     |         | Sudden medical condition         |
|        | M      | 48    | Control   | Caucasian        |      | x     |         | Sudden medical condition         |
|        | M      | 58    | MDD-NS    | Caucasian        |      | x     |         | Sudden medical condition         |
|        | M      | 39    | MDD-S     | Caucasian        |      | x     |         | Suicide                          |
|        | M      | 54    | MDD-S     | Caucasian        |      | x     |         | Suicide                          |
|        | F      | 65    | MDD-S     | Caucasian        |      | x     |         | Suicide                          |
|        | M      | 30    | MDD-S     | Caucasian        |      | x     |         | Suicide                          |
|        | M      | 31    | MDD-S     | Caucasian        |      | x     |         | Accident                         |

**Supplementary Table 2:** Average brain quality measures (pH, RNA Integrity Number (RIN), and Post-mortem interval (PMI)) across groups

|         | pH      |       | RIN     |       | PMI     |       |
|---------|---------|-------|---------|-------|---------|-------|
|         | Average | Stdev | Average | Stdev | Average | Stdev |
| Control | 6.48    | 0.22  | 7.49    | 2.47  | 22.54   | 8.19  |
| MDD-NS  | 6.53    | 0.24  | 6.93    | 3.29  | 23.61   | 7.70  |
| MDD-S   | 6.62    | 0.22  | 8.42    | 1.81  | 26.90   | 8.71  |

**Supplementary Table 3: NanoString gene targets, accession number, probe position, and supporting references**

| Group                     | Gene Symbol                        | Gene Name                                                 | Accession    | Position                                                                                     | Target Sequence                                                                                  | References                                                                                                                                                                                             |
|---------------------------|------------------------------------|-----------------------------------------------------------|--------------|----------------------------------------------------------------------------------------------|--------------------------------------------------------------------------------------------------|--------------------------------------------------------------------------------------------------------------------------------------------------------------------------------------------------------|
| Telomere Length           | ACD                                | adrenocortical dysplasia homolog                          | NM_001082486 | 219-318                                                                                      | TGTCTGACGGGACCCACAGTGTCCGATGCCTGGTACGCGGGAGGCCCTGGACACCTCGGACTGGGAGGAGAAGGAGTTCGGCTCCCGGGG       | Mamdani F, Rollins B, et al. (2015). <i>Transl Psychiatry</i> , 5(9):e636; Rice C, et al. (2016). <i>Comput Struct Biotechnol J</i> , 14:161-167; Otsuka I, et al. (2017). <i>Sci Rep</i> , 7(1):3176. |
|                           | CTC1                               | CST telomere replication complex component 1              | NM_025099.5  | 1845-1944                                                                                    | TGCTGTGCTCCCTCTGCCTTCTGCCAGCCAGGTTTACTTGGGGTCTGGTGGCTTCATCTCATAAAGGTTGTCTGCAACTTCGGGACCAAAGTG    |                                                                                                                                                                                                        |
|                           | DKC1                               | dyskerin pseudouridine synthase 1                         | NM_001363.3  | 2256-2355                                                                                    | GATGGGCTGGTAGTTTTCATCTTGTCTGGCTAGAGGTCAGTCTTTGCACTTCCTCAAAGCTGTGTACAGTGTCACTAAATCCATCTGACT       |                                                                                                                                                                                                        |
|                           | GAR1                               | GAR1 ribonucleoprotein                                    | NM_032993.2  | 642-741                                                                                      | AGGTGGAGGTGGGGCTCAGAGGAGGAAGAGGTGGTGGTTTCAGAGGGAGAGGCATTAAGTGAAACAGTTGACAGACATCACCAGTTGA         |                                                                                                                                                                                                        |
|                           | NHP2                               | NHP2 ribonucleoprotein                                    | NM_017838.3  | 316-415                                                                                      | AGCAGATTCGGCGGGGTGAAGAGGTTCAAGAAATTTGCAACAAGGAGAAAAAGGATCATGGTTTTGGCAGGAGACACACTGCCATTG          |                                                                                                                                                                                                        |
|                           | NOP10                              | NOP10 ribonucleoprotein                                   | NM_018648.3  | 327-426                                                                                      | GGAGACTCCGTAACCAAACCTCTCGAAGTGTGAGCCCTGATGCCCTTTTCCAGCCATACTCTTTGGCATCCAGTCTCTCGTGGCGATTGATTATGC |                                                                                                                                                                                                        |
|                           | OBFC1                              | oligonucleotide/oligosaccharide binding fold containing 1 | XM_006717976 | 2821-2920                                                                                    | GGCAGTAAGCATTGTCATATAAAACACTGTGCAGTCCCAAGGAGACCAAGAGAATGTGCAGTAGCCTCTGAGGAGTTTTATTTGGTTCATG      |                                                                                                                                                                                                        |
|                           | PIF1                               | PIF1 5'-to-3' DNA helicase                                | NM_025049.3  | 733-832                                                                                      | CTGTGCTGAGGGCCCTCTGAAAGGCCAGAGCATCTTCTCACTGGGAGTGCAGGAACAGGGAAGTCAATATCTGCTAAAGCGAATCTCTGGGCTC   |                                                                                                                                                                                                        |
|                           | POT1                               | protection of telomeres 1                                 | NM_015450.2  | 1076-1175                                                                                    | ATGCAGTATTTTGACCTGACTGTGACGCTCTGGGCAAAGCAGAAGTGACGGAGCATCATTTCTTAAAGGTATGGGATGGCACCAGGACACC      |                                                                                                                                                                                                        |
|                           | RTTEL                              | regulator of telomere elongation helicase 1               | NM_016434.3  | 4746-4845                                                                                    | GAGAAGCCCTGAGTACCTTGGGCTCTGGGTTGGTTTCTGGGAAAGTGTCTCCCAAGAACTCCCTGGCTCTGGCTGTGAGTGGTCCACAG        |                                                                                                                                                                                                        |
|                           | TERC                               | telomerase RNA component                                  | NR_001566.1  | 88-187                                                                                       | CCCGCGCTGTTTTCTCGTACTTTCAGCGGGCGGAAAGCCTCGGCTCGCCCTCCACCGTTCATCTTAGAGCAAACAAAAATGTCAGC           |                                                                                                                                                                                                        |
|                           | TERF1                              | telomeric repeat binding factor 1                         | NM_003218.3  | 1038-1137                                                                                    | CTGAAAGCAGAATACTGTTTCAAAGAGTCAAGCGGTAACCTCTGAAAAACATCGAGCTGAAAAAGACAGGCATGGCTTTGGGAAGAAGACA      |                                                                                                                                                                                                        |
|                           | TERF2                              | telomeric repeat binding factor 2                         | NM_005652.2  | 2466-2565                                                                                    | TGACATCAACCTAGACCTGTCTGCTTGGCATTGCTGTCAACTCTGCTGGGCTATGTAGGCAGGTTAATCCTCACTTCTCATGTGGTTGAACC     |                                                                                                                                                                                                        |
|                           | TERF2IP                            | TERF2 interacting protein                                 | NM_018975.2  | 1381-1480                                                                                    | TTGCATTGGAACCTGGCACTTATTTCTGACCATCGCTGCTGTGCTGTGTGAGTCTAGATTTTGTAGCCAAAGCAGAGTTGTAGAGGGGATATAA   |                                                                                                                                                                                                        |
| TERT                      | telomerase reverse transcriptase   | NM_198255.2                                               | 2138-2237    | GTGCTGCTGTGCGGGCCAGGACCCGCGCTGAGCTGTACTTTGTCAAGGACAGGCTCACGGAGGTCATCCGACATCATCAACCCCGACA     |                                                                                                  |                                                                                                                                                                                                        |
| TINF2                     | TERF1 interacting nuclear factor 2 | NM_001099274                                              | 1685-1784    | CTAGACCTTTGTGATAGAATAAATGCTCTGTACTCTAGTCTCTGCTCCTCAGCTCTGCAAGTAGTTTAGTAGGAATGAAGTGGAAAGTCCAG |                                                                                                  |                                                                                                                                                                                                        |
| Transcription & Cell type | ADCY1                              | adenylate cyclase 1                                       | NM_021116.2  | 12106-12220                                                                                  | GAATGGAGAGTGTATGGGCAAGGTTGTCATTTCTCGCAACAATACTCACTGAGGATGCTTCTGTAGAAGTGAGAAACACAGTGTAGTACAT      | Nagy C, et al. (2015). <i>Mol Psychiatry</i> , 20(3):320-328; Tomita H, et al. (2013). <i>Front Genet</i> , 4:297; Pandey GN, et al. (2016). <i>Int J Neuropsychopharmacol</i> , 19(8):pyw015.         |
|                           | ANK3                               | ankyrin 3                                                 | NM_001149.2  | 1561-1660                                                                                    | CAGGCCAGCCCTGTTCCAGATGAAATGTGAAAGAGTCTTGGAAACAAAGCACTTTTAGCCCAATTGTCACTGTGGAACCAAGAGACGGAA       |                                                                                                                                                                                                        |
|                           | CACNA1C                            | calcium voltage-gated channel subunit alpha1 C            | NM_199460.2  | 4786-4885                                                                                    | TGAAACACCCCTGTGGTAGCAGCTTTGCTGCTTCTACTTATCAGCTTCTACATGCTCTGTGCCTTCCTGATCATCAACCTCTTGTAGCTGTATCAT |                                                                                                                                                                                                        |
|                           | CACNB2                             | calcium voltage-gated channel auxiliary subunit beta 2    | NM_000724.3  | 2611-2710                                                                                    | TCTTTTGAAGTGTACATAAATTTGGCTGGTATGGCTGAGTCTCCGGTTGCATACTGGACTCTCAAAAACCTGTTTTGGGTAGCTGCCACTGA     |                                                                                                                                                                                                        |
|                           | CREB1                              | cAMP responsive element binding protein 1                 | NM_134442.2  | 201-300                                                                                      | CCGAGAACCAGCAGAGTGGAGATGCAGCTGTAAACAGAGCTGAAACCAACAAATGACAGTTCAAGCCAGCCACAGATTGCCACATTAGCCCA     |                                                                                                                                                                                                        |
|                           | DLG4                               | discs large MAGUK scaffold protein 4                      | NM_001365.3  | 2461-2560                                                                                    | TGCCCTGAAGAATCGGGTTCAGACGGTCAAGTATCGCTCAGTATAAACCAAGAGTACAGCCGATTCGAGGCCAAGATCCACGACCTCCGG       |                                                                                                                                                                                                        |
|                           | GFAP                               | glial fibrillary acidic protein                           | NM_002055.4  | 590-689                                                                                      | AAGCAGATGAAGCCACCTGGCCGTCTGGATCTGGAGAGGAAGATTGAGTCTGGAGGAGGAGATCCGTTCTTGAGGAAGATCCACGAGG         |                                                                                                                                                                                                        |
|                           | GPHN                               | gephyrin                                                  | NM_020806.4  | 1146-1245                                                                                    | ACTAACACGACCATCAAATCCGTGTCGGAGTCTTACAGTGAAGTATGTTGCTTCAGGAATCTTGAGAAAGCCAGTGGGATAAATCTCAA        |                                                                                                                                                                                                        |
|                           | GPR37                              | G protein-coupled receptor 37                             | NM_005302.2  | 1891-1990                                                                                    | GCTCCGGCAGAAAGGTGCAATTATTAAGATCTCTCTGATTACAGACACCATCTATGTTCTAGCCCTCACTACGACAGTGCAGAGCTGTGGTG     |                                                                                                                                                                                                        |
|                           | MAP2                               | microtubule associated protein 2                          | NM_031845.2  | 5171-5270                                                                                    | TACTCTGTATGCTGGGATCCGAGGTTCCAACACTGTAACTCTGTGGGGGTTCTTCTTCTGATAATTTAGAGCCTGTACCATAGAAAA          |                                                                                                                                                                                                        |
|                           | NFE2L2                             | nuclear factor, erythroid 2 like 2                        | NM_006164.3  | 996-1095                                                                                     | TCCGGTCACTCAGAGCCAGTCTTCAATGCTACTAATCAGGCTCAGTCACTGAACTCTGTTGCTCAGGTAGCCCTGTGATTATGAGCGGT        |                                                                                                                                                                                                        |
|                           | RBOX3                              | RNA binding protein, fox-1 homolog 3                      | NM_001082575 | 577-676                                                                                      | TTTAGACGTGGAGATCATTTTAAACAGCGGGCTCAAGGTTTTGGGTTTGAACCTTTGAAACTAGCTCAGATGCTGACCCAGCCGGGAGG        |                                                                                                                                                                                                        |
|                           | SKA2                               | spindle and kinetochore associated complex subunit 2      | NM_182620.3  | 51-150                                                                                       | TTTGACACAGCAGCAATCCTCTCGCGGTTTTGTGCTTGTCCCAACAGGAAATGTCTCATGACAGAGGGCGTTACCCAGTCTCCAATGGGG       |                                                                                                                                                                                                        |
|                           | SOX10                              | SRY-box 10                                                | NM_006941.3  | 2160-2259                                                                                    | GGCGGTGCTCCCACTCAGGGGCTGAGAGTAGCTTTGAGGACCTCATTGGGGAGTGGGGGTTCCAGGGGACTAGTGAGGTTCTCATCCCTTC      |                                                                                                                                                                                                        |
| SOX9                      | SRY-box 9                          | NM_000346.2                                               | 2136-2235    | CAGTGGCCAGGCCAACCCTGGCTAAATGGAGCAGCGAAATCAACGAGAACTGGACTTTTTAAACCTCTCAGAGCAAGCTGGAGGATGATG   |                                                                                                  |                                                                                                                                                                                                        |

Supplementary Table 3 Continued:

| Group                      | Gene Symbol              | Gene Name                                           | Accession       | Position                                                                                     | Target Sequence                                                                                | References                                                                                                                                                                                                     |
|----------------------------|--------------------------|-----------------------------------------------------|-----------------|----------------------------------------------------------------------------------------------|------------------------------------------------------------------------------------------------|----------------------------------------------------------------------------------------------------------------------------------------------------------------------------------------------------------------|
| Polyamine System           | AGMAT                    | agmatinase                                          | NM_024758.4     | 2053-2152                                                                                    | TGCTTAGGGCTCATCTTGGTTTAAAGACCCTGTGAACGTAAAGTAAAGTAAACACGGAGAGCCTAATGAAGAACTCTTGCTCA            | Sequeira A, et al. (2006). <i>Arch Gen Psychiatry</i> , 63(1):35-48                                                                                                                                            |
|                            | AZIN1                    | antizyme inhibitor 1                                | NM_148174.2     | 506-605                                                                                      | TTGCATATCTAAGGACCCAGACATAGGCTTGGTGGCCCTCTCTTCTTCTGGTTTATGACTTTCCGGCTTTGTGAATACGGCTGAGATGAA     |                                                                                                                                                                                                                |
|                            | AMD1                     | adenosylmethionine decarboxylase 1                  | NM_001634.4     | 811-910                                                                                      | TTTCCAGAGAGTGGGTAATCAGTCAGCCAGATCAACCTTGGAAATCTGTAGTGTAGTGTGACCCAGCAGTATGGACAGTTCATACATGA      |                                                                                                                                                                                                                |
|                            | EIF5A                    | eukaryotic translation initiation factor 5A         | NM_001970.4     | 294-393                                                                                      | AAATGAGTGTCTCAGCATACCTAAGAAAGTGGCTTGTGGTCTCAAAGGCCGGCCATGAAGATCGTCAGATGTCTACTTCCGAAGACTGGCAAG  |                                                                                                                                                                                                                |
|                            | MTHFR                    | methylenetetrahydrofolate reductase                 | NM_005957.4     | 1041-1140                                                                                    | TGTCCAAGCTGGAGTGCCACAGGAGATCAAGGACGTGATTGACCAATCAAAGACAACGATGTGCCATCCGCACTATGGCATCGAGCTGG      |                                                                                                                                                                                                                |
|                            | OAZ1                     | ornithine decarboxylase antizyme 1                  | NM_004152.2     | 314-413                                                                                      | GGTGGGGCAGGGAAAGTCAAGAGGATCAAACTTTTCAAGTAACTTACTCTGATGATCGGTGAATGTAACAGAGAACTAACCTGAGCTCA      |                                                                                                                                                                                                                |
|                            | OAZ2                     | ornithine decarboxylase antizyme 2                  | NM_002537.2     | 367-466                                                                                      | CCTTCTCTCAGCTCAATATATAAAGACGAGAAGCTCACTGTGACCCAGGACTCCCTGTGAATGATGAAAACTCACATCGTCCACTCCAG      |                                                                                                                                                                                                                |
|                            | ODC1                     | ornithine decarboxylase 1                           | NM_002539.1     | 951-1050                                                                                     | AGACCTCTGTGACGCAATCTCTGTGTCGCCGTGTGTTTTGACATGGGGGCTGAGTGTGGTTTTCAGCATGTATCTGCTGATATTGGCGGTGGC  |                                                                                                                                                                                                                |
|                            | PAOX                     | polyamine oxidase                                   | NM_152911.2     | 849-948                                                                                      | CAGGAGGCAGCCTTCCCGGGGAGACCTTCCAGTGTGCGTAGAGTGTGAGGATGAGACCGGTTCCCGCGCACCATGTATCATCTCACCGTG     |                                                                                                                                                                                                                |
|                            | PMF1                     | polyamine modulated factor 1                        | NM_007221.3     | 1023-1122                                                                                    | CAGCCAGGGGCTTACCAGTGTCTTCCACATCCGTAATAAACTTCTTCACTACACTGTAATCTGTGAGCATGCTTCTCTGCCTGGCCTCTC     |                                                                                                                                                                                                                |
|                            | PMFBP1                   | polyamine modulated factor 1 binding protein 1      | NM_031293.2     | 849-948                                                                                      | ACACTTCTCTGATGATTCAAGAGCATCAGGAGACTAGAAACGACTGTGAACTGGCAAAAAGTCTCTCAACAGGATGATCTCATTCAA        |                                                                                                                                                                                                                |
|                            | SAT1-001                 | spermidine/spermine N1-acetyltransferase 1          | ENST00000379270 | 326-425                                                                                      | CCCCTTTTACCCTCGCTGGTTCGCAAGAGTCCGCAAGAGCAGCTGGACTCCGGAAGGACACAGCATTGTGGTTTGGCCATGACTATTTTACCTA |                                                                                                                                                                                                                |
|                            | SAT1-002                 | spermidine/spermine N1-acetyltransferase 1          | ENST00000489394 | 316-415                                                                                      | GCCTGGTTGCAAGAGTCCGAAAGAGCAGCTGGACTCCGGAAGGTTACAGTCTCTAGTTCGCCATGTACATGGCCCTCCGTGTACATGGATGG   |                                                                                                                                                                                                                |
|                            | SAT1-004                 | spermidine/spermine N1-acetyltransferase 1          | ENST00000379251 | 248-347                                                                                      | GCTGGCTAAATATGAATACATGGAAGAACAAGTAACTTAACTGAAAAGGTAATTCACAGTGGCGGACGGGGACAAGCGTTCGGTGCC        |                                                                                                                                                                                                                |
|                            | SAT1_all                 | spermidine/spermine N1-acetyltransferase 1          | NM_002970.2     | 463-562                                                                                      | ATCTTGAGGACTTCTGTGATGAGTATTAGAGGCTTGGCATAGGACTCAGAAATCTGAAAGATTAAGCCAGGTTGCAATGAGGTGCTGG       |                                                                                                                                                                                                                |
|                            | SMOX                     | spermine oxidase                                    | NM_175839.1     | 162-261                                                                                      | CTCAGCAGGGAAGGTTCTGAAGGTTGAGCGGACGAGGATGCAAAAGTTGTAATCCAGTGTGACAGTGGGATGCGGATGCGGCTCAGTCCG     |                                                                                                                                                                                                                |
| SMS                        | spermine synthase        | NM_004595.2                                         | 1025-1124       | GGATGGGAAATATTTACACAGGGAACTGTGCAATCTGACAGAAGCAGTGTGCTCTATGAAAGACAGCTGGGGCGCTGATTGTCCTGTG     |                                                                                                |                                                                                                                                                                                                                |
| SRM                        | spermidine synthase      | NM_003132.2                                         | 255-354         | GCAGTAAGACCTATGGCAAGCTGTGTGTTGGACGGTGTCTCAGTGCACGGAGAGAGCAGGTTCTCTACCAGGAGATGATGCCAACCC      |                                                                                                |                                                                                                                                                                                                                |
| Circadian Rhythm           | ARNTL                    | aryl hydrocarbon receptor nuclear translocator like | NM_001030272.1  | 841-940                                                                                      | GATGTGACCCGAGGGAAGATACTCTTGTCTCAGAGTGTGTTCTCAAGATCCTCACTACAGCCAGAAATGATCTGATTTGGTGTGAGTTTGTG   | Li JZ, et al. (2013). <i>Proc Natl Acad Sci U S A</i> , 110(24): 9950-9955; Melhuish Beaupre L, et al. (2020). <i>World J Biol Psychiatry</i> , 21(2):80-90.                                                   |
|                            | CLOCK                    | clock circadian regulator                           | NM_004898.2     | 2351-2450                                                                                    | AGCCGGGAAGCATGGTCCAGATTCATCTAGTATGCCCAAAAACAGCACCAGAGTGTGCAAGTACTACATCACTCAGGACAGGACAGTAAGA    |                                                                                                                                                                                                                |
|                            | CRY1                     | cryptochrome circadian clock 1                      | NM_004075.3     | 1376-1475                                                                                    | GAAAGTATGAAAAGTGCAAACTCTCTGTCTGTGATGACCATGATGAGAAATATGGAGTCCCTTCACTGGAAGAGTAGGTTTGTATACAGATG   |                                                                                                                                                                                                                |
|                            | CRY2                     | cryptochrome circadian clock 2                      | NM_001127457.1  | 3326-3425                                                                                    | ATCACTGACAGGCTTCTCTGAGATTCCTCAGTTTTCTCAGCCAGAGAGTGCCTTTAGAGTCCAACTGTTGTACTGATGTCACCTTCACTA     |                                                                                                                                                                                                                |
|                            | NPAS2                    | neuronal PAS domain protein 2                       | NM_002518.3     | 1459-1558                                                                                    | CTTTAACACTCGAGCTGGTGCCTGGGCTTAAATACCAGTCATTCCGCATCCGGCTCTCAAGAAGTCCCAAAATCTCGCACACAGCCAA       |                                                                                                                                                                                                                |
|                            | PER1                     | period circadian clock 1                            | NM_002616.2     | 4366-4465                                                                                    | CCTGGCAAAAGTTCTGCAAGCTGTGAACTGAGTGCCTCATATTTCCAGTGTGAGCTGACTCTTGGAGGTTGGGGTTCAGCACTATTTA       |                                                                                                                                                                                                                |
|                            | PER2                     | period circadian clock 2                            | NM_022817.2     | 986-1085                                                                                     | TGTGGAGCATGTGACGTGGAGCAGATCTTTTACTCAAGATGCATGGAGGAGAAATCTTCTTTTGGCGTGTGACGTGCGGAAAAGCCACGA     |                                                                                                                                                                                                                |
| PER3                       | period circadian clock 3 | NM_016831.1                                         | 1076-1175       | GACCTGATTGGAAACATCGATCTAAGCTACCTGCACCTGGAAGATGCTTCTGTATGTTGGCATAACAAAAGTTTGGAAATGACAGGGCA    |                                                                                                |                                                                                                                                                                                                                |
| Stress and Immune Response | BDNF                     | brain derived neurotrophic factor                   | NM_170732.4     | 731-830                                                                                      | CAGGTTGATGCTCAGTAGTCAAGTGCCTTTGGAGCCTCTCTCTTCTGCTGGAGGAATACAAAATACCTAGATGCTGCAAAATGCTTCA       | Yin H, et al. (2016). <i>Depress Anxiety</i> , 33(6):531-540; Melhem NM, et al. (2017). <i>Psychoneuroendocrinology</i> , 77:284-294; Tonelli LH, et al. (2008). <i>Acta Psychiatr Scand</i> , 117(3):198-206. |
|                            | CRH                      | corticotropin releasing hormone                     | NM_000756.1     | 682-781                                                                                      | ACCTCTCCGGGAAGCTTTGGAAATGGCCAGGGCAGGAGTTAGCACAGCAAGCTCACAGCAACAGGAACTCATGGAGTATTGGGAAAT        |                                                                                                                                                                                                                |
|                            | FKBP5                    | FK506 binding protein 5                             | NM_001145775.1  | 541-640                                                                                      | ACCATTTGCTTTAGTCTTGGCAAAAGCCAAAGTCAACAGGATGGGACATGGGGTGGCTACCATTGAAGAAAGGAGAGATATGCCATTTACTG   |                                                                                                                                                                                                                |
|                            | HSD11B1                  | hydroxysteroid 11-beta dehydrogenase 1              | NM_181755.1     | 156-255                                                                                      | GCCTACTACTATTTGCAAAACAGGAATTCAGACAGGAGATGCTTCAAGGAAAGAAAGTATTGTCACAGGGCCAGCAAAGGGATCGGA        |                                                                                                                                                                                                                |
|                            | HSD11B2                  | hydroxysteroid 11-beta dehydrogenase 2              | NM_000196.3     | 1703-1802                                                                                    | CCTCAGGATTTTCTCGCACCAAGTGCCTCAGTGTGCAATTTGAGGGCTAAATCCAAAGTGTCTTCTGACTGCTCAAGAAATGAGCCCAAC     |                                                                                                                                                                                                                |
|                            | HSP90AA1                 | heat shock protein 90 alpha family class A member 1 | NM_001017963.2  | 1656-1755                                                                                    | CTTGACCAATGACTGGGAAGTCACTTGGCAGTGAAGCATTTTTCAAGTTGAAGGACAGTTGGAATTCAGAGCCCTCTATTGTTGCCACGACGTG |                                                                                                                                                                                                                |
|                            | HSPA2                    | heat shock protein family A (Hsp70) member 2        | NM_021979.3     | 2096-2195                                                                                    | AAGATCCTGACAAAGTGTGAGGAGTGTCAACTGCTCGACCGAAAACAGATGGCAGAGAAAGATGAGTATGAACACAAGCAGAAAGAGCT      |                                                                                                                                                                                                                |
|                            | NPY                      | neuropeptide Y                                      | NM_000905.2     | 271-370                                                                                      | AGAGATATGAAAACGATCCAGCCAGAGACATGTTTTCAGACCTTGTATGAGAGAAAAGCAGAGAAAATGTTCCAGAACTCGGCTTGAAG      |                                                                                                                                                                                                                |
|                            | NR3C1                    | nuclear receptor subfamily 3 group C member 1       | NM_001018077.1  | 1666-1765                                                                                    | GCTTTCTCTGCGGGGAGAAAGACATTCATTTCTTTGAAAGGAAACTCGAATGAGGACTGCAAGCTCTCATTTCACGACACTAAACCCA       |                                                                                                                                                                                                                |
|                            | PPARA                    | peroxisome proliferator activated receptor alpha    | NM_001001928.2  | 5221-5320                                                                                    | GGGTGTGTTTGTATACGAACATAATGGACGTGAAGTGGGGCAGAAACCCAGAATCAGCATTCAAGGATGCCAGGAGAGTGTCCCTGTTT      |                                                                                                                                                                                                                |
|                            | PPARD                    | peroxisome proliferator activated receptor delta    | NM_006238.4     | 108-207                                                                                      | GTAGGACGCGGGACAGTGTGTGACAGTGTGTTGGGATGACAGTACTACACAGTGGCTTCTGCTCAACCAAGATGAAGACAGATGCACT       |                                                                                                                                                                                                                |
|                            | PPARG                    | peroxisome proliferator activated receptor gamma    | NM_015869.3     | 1036-1135                                                                                    | GAGCAAAAGAGTGGCCATCCGCATCTTTCAGGGCTGCCAGTTTCTGCTCGTGGAGGCTGTGAGGAGATCAGAGATGCCCCAAAGCATTC      |                                                                                                                                                                                                                |
|                            | SGK1                     | serum/glucocorticoid regulated kinase 1             | NM_005627.2     | 1791-1890                                                                                    | GTGTGAACCGTGTGTGAGTGTGATGCTGATACAGATGGAATTTGTTATAAGCATCAATGTGACACTTGCAGGACACTACAAGTGGGAC       |                                                                                                                                                                                                                |
|                            | CD19                     | CD19 molecule                                       | XM_011545981.1  | 714-813                                                                                      | CACCCAAAGGGCCTAAGTCAATGCTGAGCCTAGAGCTGAAGGACATGCCCCGAGAGATATGGGTAATGGAGACGGTCTGTGTTG           |                                                                                                                                                                                                                |
|                            | CD6                      | CD6 molecule                                        | NM_001254751.1  | 1723-1822                                                                                    | AACCTGGACACTGCTTACAGACCCGCTCCTGGCCCTCAGTATCACCAGGAGCAACAGTGTGAGTGTGACCTCTTTCAGGGGAGCTT         |                                                                                                                                                                                                                |
|                            | CD68                     | CD68 molecule                                       | NM_001251.2     | 1141-1240                                                                                    | ACCGTCTCCTTGTGCTCTCATCATCGGCTGCTTCTTGGCTCTCCGCTGTGCTTATTGCTCATCTCCGAGACAGCCCATCC               |                                                                                                                                                                                                                |
|                            | CD8A                     | CD8a molecule                                       | NM_001768.5     | 1321-1420                                                                                    | GCTCAGGGCTTCTTCCACACACTCAGGCTTCTTCCGAGGCCCTGTCTCAGGGTGTGAGTGTGAGTCTCAACGGCAAGGGAACAAG          |                                                                                                                                                                                                                |
|                            | FCAR                     | Fc fragment of IgA receptor                         | NM_002000.2     | 1416-1515                                                                                    | TGCTGAGATTATAGGCAATGAGCCACAGCCGCTGGCAGATGATGTTCAAACCAATCAAATGGTGTCTTCTATGACAGGACTGATCGATTGAC   |                                                                                                                                                                                                                |
|                            | FGF2                     | fibroblast growth factor 2                          | NM_002006.4     | 621-720                                                                                      | GTCCGGGAGAAGAGCCCTCATCAAGTCAAACTTCAAGCAGAAAGAGAGAGGAGTGTGCTATCAAAGGAGTGTGTGCTAACCGTTAC         |                                                                                                                                                                                                                |
|                            | FOXP3                    | forkhead box P3                                     | NM_014009.3     | 1231-1330                                                                                    | GGGCACTCTGGAGGCTCAGAGAAGCAGGACACTCAATGAGATCACTACCACTGTTTCCACAGTGTGTTGCTTCTTCCAGAACTGCGC        |                                                                                                                                                                                                                |
| IFNG                       | interferon gamma         | NM_000619.2                                         | 971-1070        | ATACTATCCAGTTACTGCGGTTTGAATAATGCCTGCAATCTGAGCCAGTGTCTTAAATGGCATGTGACAGAACTTGAATGTGTGAGGTGACC |                                                                                                |                                                                                                                                                                                                                |
| IL1B                       | interleukin 1 beta       | NM_000576.2                                         | 841-940         | GGGACCAAAGGCGGCCAGGATATACTGACTTCAACATGCAATTTGTCTTCTTAAAGAGAGCTGACCCAGAGAGTCTGTGCTGAATGTGG    |                                                                                                |                                                                                                                                                                                                                |
| IL6                        | interleukin 6            | NM_000600.3                                         | 365-464         | GGCACTGCGAGAAAACCTGAACCTTCAAAGATGGCTGAAAAGATGATGCTTCCAATCTGGATTAATGAGGAGACTTGCCTGGTGAAC      |                                                                                                |                                                                                                                                                                                                                |
| TNF                        | tumor necrosis factor    | NM_000594.2                                         | 1011-1110       | AGCAACAAGCAACCACTTCAAACTGGGATTCAGGAATGTGTGGCTGCAAGTGAAGTGTGGCAACCACTAAGAACTCAAACTGGGGCC      |                                                                                                |                                                                                                                                                                                                                |

Supplementary Table 3 Continued:

| Group                  | Gene Symbol                        | Gene Name                                               | Accession         | Position                                                                                     | Target Sequence                                                                                   | References                                                                                                                                                                                                                             |
|------------------------|------------------------------------|---------------------------------------------------------|-------------------|----------------------------------------------------------------------------------------------|---------------------------------------------------------------------------------------------------|----------------------------------------------------------------------------------------------------------------------------------------------------------------------------------------------------------------------------------------|
| Neurotransmission      | GABRA1                             | gamma-aminobutyric acid type A receptor alpha1 subunit  | NM_000806.5       | 476-575                                                                                      | AAAGTCCAGTGTCTGCTGACTGCTTTGGGCTGGATCTCTCTGAGCACACTGACTGGAAGAAGCTATGGACAGCCGTCATTACAAGATGAA        |                                                                                                                                                                                                                                        |
|                        | GABRA2                             | gamma-aminobutyric acid type A receptor alpha2 subunit  | NM_000807.2       | 751-850                                                                                      | CTTCGAATTCAGGATGATGGGACTCTGCTGTATACCATGAGGCTTACAGTTCAAGCTGAATGCCAATGCACCTTGGAGGATTTCCTCAATGGATGCT |                                                                                                                                                                                                                                        |
|                        | GABRB3                             | gamma-aminobutyric acid type A receptor beta3 subunit   | NM_000814.5       | 449-548                                                                                      | TGGCTGACCAGCTAGGGTGCCTGACACATATTCTTAATGACAAAAGTCAATTTGTGCATGGAGTGACAGTGAAAAACCCGATGATCCGCTCTT     |                                                                                                                                                                                                                                        |
|                        | GABRG1                             | gamma-aminobutyric acid type A receptor gamma1 subunit  | NM_173536.3       | 5921-6020                                                                                    | GCTTTGACTAACAGACAACATAAECTGAGAGACATGGTGTGTGGGTGGAAGGGATCCTGTAGTAGACTTGTTCATGATAGATGGGTACAAA       |                                                                                                                                                                                                                                        |
|                        | GABRG2                             | gamma-aminobutyric acid type A receptor gamma2 subunit  | NM_000816.3       | 1-100                                                                                        | GTAAGTGTGAGGGGATGAGTATACAGAGTGTGCTGTTCCCTCTCCCTTAATTTGTCTCCGATGAGTCTCTCTGTACCCCTCCCTGCTC          |                                                                                                                                                                                                                                        |
|                        | GRIA1                              | glutamate ionotropic receptor AMPA type subunit 1       | NM_000827.3       | 2841-2940                                                                                    | ATCGAGTCTGCTACAATCCGTAGTGAATCCAAAGCGGATGAAGGGTTTTGTGTTGATCCACAGCAATCCATCAAGCAAGCCATACCGACATC      |                                                                                                                                                                                                                                        |
|                        | GRIA2                              | glutamate ionotropic receptor AMPA type subunit 2       | NM_001083620.1    | 866-965                                                                                      | TGACCTATGATGCCGTTCAAGTGATGACTGAAGCCTTCCGCAACCTAAGGAAGCAAGAATTGAATCTCCGAAGGGGGAATCAGGAGACTG        | Sequeira A, et al. (2009). <i>PLoS One</i> , 4(8):e6585; Yin H, et al. (2016). <i>Am J Med Genet B Neuropsychiatr Genet</i> , 171B(3):414-426; Turecki G, et al. (2003). <i>Am J Med Genet B Neuropsychiatr Genet</i> , 118B(1):36-40. |
|                        | GRIA3                              | glutamate ionotropic receptor AMPA type subunit 3       | NM_000828.4       | 427-526                                                                                      | TGCAGGAGCACAGCCTTCCGCTTCCGCTGAGTATACAACACCAACAGAACACCACCGAGAAGCCCTTCCATTTGAATACACAGTATGAT         |                                                                                                                                                                                                                                        |
|                        | GRIA4                              | glutamate ionotropic receptor AMPA type subunit 4       | NM_000829.3       | 476-575                                                                                      | GTTATTTTCTGGATTTTGGGACTCGCCATGGGAGCCTTCCGAGCAGCGTGCAATAGGTGTCTCTTCCGAAACACAGATCAGGAATACAC         |                                                                                                                                                                                                                                        |
|                        | GRIN1                              | glutamate ionotropic receptor NMDA type subunit 1       | NM_000832.5       | 1291-1390                                                                                    | TTCAGAGAGTCTGATGCTTCCAAGTATGCGGATGGGGTACTGCTGCGTGGAGTTCAATGAGGATGGGGACCGAAGTTCGCAACTAC            |                                                                                                                                                                                                                                        |
|                        | GRIN2A                             | glutamate ionotropic receptor NMDA type subunit 2A      | NM_000833.3       | 4498-4597                                                                                    | GAATGACAGCTATCTTCGGTCTCTTGAAGTCAACGGCATCTGACTGTCCAGGGACAGTCCGGGCAACAATGATGTATATTTCCGGAGCATG       |                                                                                                                                                                                                                                        |
|                        | GRIN2B                             | glutamate ionotropic receptor NMDA type subunit 2B      | NM_000834.3       | 1145-1244                                                                                    | CAACACCCACGAGAAGAAATCTTCCAGTCCAATATGCTAAATAGTATCTGATCAATGTCACTTTTGGGGGAGGAATTTGCTTCTCAGTGAAG      |                                                                                                                                                                                                                                        |
|                        | GRIN2C                             | glutamate ionotropic receptor NMDA type subunit 2C      | NM_000835.3       | 2104-2203                                                                                    | TTCATGATCCAAGAGCAATACATCGACACTGTGCTGGGCTCAGTGACAAGAAAGTTTCAGCGGCCCTCAAGATCAGTACCCACTTCCGCTTCGG    |                                                                                                                                                                                                                                        |
|                        | GRIN2D                             | glutamate ionotropic receptor NMDA type subunit 2D      | NM_000836.2       | 1894-1993                                                                                    | CATCTCTGAGTACTCTGCTGTGTTACAACCGGCTGCCACGGCCCTGGCCGTTCAACCTTCCACTTCCGCTTCCGCTTCCGCTTCCGCTTCCG      |                                                                                                                                                                                                                                        |
|                        | GRM3                               | glutamate metabotropic receptor 3                       | NM_000840.2       | 461-560                                                                                      | TTCTGCCAAGAGTCCAATAGATGCGACGGCTTCCAGCTGGTCAAGTGAAGGAAAGTTGCTTCCGCGCTAGGAAGTGGTTTGCCTGATAAG        |                                                                                                                                                                                                                                        |
|                        | HTR1A                              | 5-hydroxytryptamine receptor 1A                         | NM_000524.2       | 626-725                                                                                      | TGCTCATGCTGTTCTCTATGGGCGCATATCCGAGCTGCGGCTTCCGATCCGCAAGACGGTCAAAAAGGTGGAAGACCGGAGCGGACAC          |                                                                                                                                                                                                                                        |
| HTR2A                  | 5-hydroxytryptamine receptor 2A    | NM_000621.3                                             | 3460-3559         | AGGCTGAGACGCAAGGATCACTGAGCCAGAAGCTCAAGGCTGCAAGTGAAGGAAAGTTGCTTCCGCGCTAGGAAGTGGTTTGCCTGATAAG  |                                                                                                   |                                                                                                                                                                                                                                        |
| MAOA                   | monoamine oxidase A                | NM_000240.2                                             | 201-300           | CGAGTATCGCGGCCATGTTCGACGTAGTCTGATCGGAGGTGGCAATTCAGGACTATCTGCTGCCAACTCTGACTGAATATGGCGTTAGT    |                                                                                                   |                                                                                                                                                                                                                                        |
| SLC6A4                 | solute carrier family 6 member 4   | NM_001045.2                                             | 236-335           | CCGAGAGTCAATGGGATCCTTGGCAGATGGACATCAAGTCTTACTAACCAGCAGGATGGAGACGACGCCCTTGAATCTCAGAAGCAGCT    |                                                                                                   |                                                                                                                                                                                                                                        |
| Mitochondria           | MFN2                               | mitofusin 2                                             | NM_014874.3       | 2011-2110                                                                                    | CAGTGCTTCTCCCTCAACTATGACCTAACTGTGACAAGCTGTGTGCTGACTTCCAGGAAGACATTGAGTTCATTTCTCTCTCGGATGGACATG     |                                                                                                                                                                                                                                        |
|                        | MT-ATP6                            | mitochondrially encoded ATP synthase membrane subunit 6 | ENST00000361899.1 | 472-571                                                                                      | GTACGCCATAACCGCTAACATTACTGACGGCCACTACTCATGCACTAATTGGAAGCGCCACCCTAGCAATATCAACCAATTAACCTTCCCTCACAC  | Rollins B, et al. (2009). <i>PLoS One</i> , 4(3):e4913; Mamdani F, et al. (2014). <i>Schizophr Res</i> , 159(2-3):370-375.                                                                                                             |
|                        | MT-ND6                             | mitochondrially encoded NADH dehydrogenase 6            | Mito_JCM_011.1    | 266-365                                                                                      | CTTTGGATATACTACAGCGATGGCTATTGAGGAGTACTCTGAGGATGGGGTTCAGGGTTGAGGTTGGTGAAGTGTGTTAGTGGGTTAGCG        |                                                                                                                                                                                                                                        |
|                        | MTPAP                              | mitochondrial poly(A) polymerase                        | NM_018109.3       | 196-295                                                                                      | CAGCCCTCAGGGAGCGTGAGGACAGGCTTTGAAGACAAGATTCCAAAAGGAGATTCTCTGAGATGCAAAATGAAAGACGAGAACAGGCACAC      |                                                                                                                                                                                                                                        |
| SLC25A26               | solute carrier family 25 member 26 | XM_006712957.1                                          | 432-531           | AGCAGAGGGCACAGGTATCTGCTTCAAGAACAATTTTCAGATTTTCTTAACATCTTATATGAAGAGGGTATCCAAGGTTGATCGAGGCTATA |                                                                                                   |                                                                                                                                                                                                                                        |
| Metallothionein System | MT1A                               | metallothionein 1A                                      | NM_005946.2       | 1-100                                                                                        | ACCAAGCCTTCCAGTGCCTTATAGCTCTCAACTTCTGCTTGGATCTCCAACCTCACCGGCTCGAAATGGACCCCAACTGCTCTCGCCG          |                                                                                                                                                                                                                                        |
|                        | MT1B                               | metallothionein 1B                                      | NM_005947.2       | 1-100                                                                                        | CCTGCGCTGACTTCTCATATCTTGCTAGGAACTCCAGGCTTGTCTGGCTCCAAATGGATCCCAACTGCTCTGCACCACAGGTGGCTCTGTGCC     |                                                                                                                                                                                                                                        |
|                        | MT1E                               | metallothionein 1E                                      | NM_175617.3       | 33-132                                                                                       | GGTGAGGCGGGAGCTGGGCTCTGCGCCCGCCGACTCTATAAATAGAGCAGCCAGTTGCAGGGCTCAATCTGCTTCCCACTGCC               |                                                                                                                                                                                                                                        |
|                        | MT1F                               | metallothionein 1F                                      | NM_005949.3       | 15-114                                                                                       | CTATCAAAGCAGCGCCGGCTTGGGGTCCACACGCTTCCACTGCCCACTGCTTCTTCCGCTTCTCTTGGAAAGTCCAGTCTCTCTCCGCG         |                                                                                                                                                                                                                                        |
|                        | MT1G                               | metallothionein 1G                                      | NM_005950.1       | 215-314                                                                                      | GCATCTGCAAAGGGGATCGGAGAAGTGACGCTGTGCGCTGATGTCGGGACAGCCCTGCTCCCAAGTACAAATAGAGTGACCCGTAATAATCT      |                                                                                                                                                                                                                                        |
|                        | MT1H                               | metallothionein 1H                                      | NM_005951.2       | 215-314                                                                                      | CATCTGCAAAGGGGCTCAGAGAAGTGACGCTGTGCGCTGATGTCGGGACAGCCCTGCTGTGATGAAAACAGAAATGACACGTAATAATCT        |                                                                                                                                                                                                                                        |
|                        | MT1X                               | metallothionein 1X                                      | NM_005952.3       | 32-131                                                                                       | TTCTCTTGTATCGGGAATCTGCTTCTCTTCTGCTGAAATGGACCCCACTGCTCTGCTGCTGTTGGCTCTGTGCTGCTGCTGCTGCTGCTGCTG     |                                                                                                                                                                                                                                        |
|                        | MT2A                               | metallothionein 2A                                      | NM_005953.3       | 226-325                                                                                      | CAGGGCTGCATCTGCAAAGGGGCTCGGACAAGTGACGCTGCTGCGCTGATGCTGGGACAGCCCGCTCCAGATGTAAGAAACGCGACTTCT        |                                                                                                                                                                                                                                        |
| MT3                    | metallothionein 3                  | NM_005954.2                                             | 166-265           | CCTAGCCAAAGCGCGCTCAGTGTGCTGAGAAGCCGCTTCCAGCCCTCCAGCTGCTCTCTGACATGACCTGAGACCTGACCTGCTCCCTG    |                                                                                                   |                                                                                                                                                                                                                                        |
| Housekeeping           | CYC1                               | cytochrome c1                                           | NM_001916.4       | 345-444                                                                                      | TATCCGTGCTCACCCGTGGCTCTCTCTCTTCTGACCAACACAGCATCCGAGGGGTTTTCCAGGATATAAGCAGGTGTGCGCTCTGCTCCAC       |                                                                                                                                                                                                                                        |
|                        | GAPDH                              | glyceraldehyde-3-phosphate dehydrogenase                | NM_002046.3       | 973-1072                                                                                     | CACCTCTCCACTTTGACGCTGGGGCTGGCATTGCCCTCAACGACCACTTTGCAAGCTCAATTTCTGGTATGACAACGAATTTGGCTACAGCAACA   |                                                                                                                                                                                                                                        |
|                        | SDHA                               | succinate dehydrogenase complex flavoprotein subunit A  | NM_004168.1       | 231-330                                                                                      | TGGAGGGGACAGCTTGCAGAGCTGATTGGCTTCTGAGGACAGGGTTAATACAGCATGTGTTCAAGCTGTTTCTACCAGGTACACACTG          |                                                                                                                                                                                                                                        |

**Supplementary Table 4:** Top five genes affected by adjusted time of death in the DLPFC (P≤0.05)

| Gene     | P (Sex) | P (Age) | P (Diagnosis) | P (Adjusted TOD) | P (MDD-S vs. MDD-NS) | FC (MDD-S vs. MDD-NS) | FC Direction |
|----------|---------|---------|---------------|------------------|----------------------|-----------------------|--------------|
| PER2     | 0.0003  | 0.057   | 0.205         | 0.003            | 0.158                | 1.193                 | UP           |
| CRY1     | 0.013   | 0.034   | 0.504         | 0.016            | 0.880                | 1.014                 | UP           |
| CRH      | 0.001   | 0.015   | 0.064         | 0.030            | 0.022                | 1.384                 | UP           |
| SAT1-002 | 0.115   | 0.283   | 0.035         | 0.039            | 0.649                | -1.063                | DOWN         |
| SAT1-004 | 0.594   | 0.010   | 0.287         | 0.041            | 0.165                | -1.242                | DOWN         |

**Supplementary Table 5:** Field of View (FOV) for brain and blood

|              | Average FOV | FOV Stdev | % FOV | Min % FOV | Max % FOV |
|--------------|-------------|-----------|-------|-----------|-----------|
| <b>Brain</b> | 533.94      | 10.84     | 96.21 | 85.23     | 98.74     |
| <b>Blood</b> | 540.06      | 8.27      | 97.31 | 92.43     | 99.64     |

The FOV is an imaging quality control measure from NanoString which is indicative of the number of mRNA counts successfully imaged per lane in the array. Samples having low assay efficiency due to low quality of RNA will have a low number of counts and will result in a quality flag. The FOV threshold is set at 75% and any sample below this threshold is flagged and should not be used for downstream analysis. As can be seen in the table we have included in the supplemental, our % FOV is very comparable between brain and blood, thus demonstrating the lack of effect of low RIN in the blood on mRNA measures.



**Supplementary Table 6:** Blood differentially expressed genes between MDD-S and Controls ( $P \leq 0.05$ )

| Gene     | Mean (Control) | Mean (MDD-NS) | Mean (MDD-S) | P (MDD-S vs. Control) | Q Value (MDD-S vs. Control) | FC (MDD-S vs. Control) | FC Direction |
|----------|----------------|---------------|--------------|-----------------------|-----------------------------|------------------------|--------------|
| POT1     | 6.624          | 6.886         | 7.403        | 0.0009                | <b>0.035</b>                | 1.841                  | UP           |
| SLC25A26 | 6.834          | 6.815         | 7.945        | 0.002                 | <b>0.018</b>                | 2.297                  | UP           |
| EIF5A    | 9.528          | 9.873         | 10.272       | 0.004                 | <b>0.035</b>                | 1.672                  | UP           |
| HTR2A    | 3.361          | 2.843         | 2.209        | 0.005                 | <b>0.019</b>                | -2.189                 | DOWN         |
| GAR1     | 6.209          | 6.227         | 6.734        | 0.006                 | <b>0.018</b>                | 1.443                  | UP           |
| NR3C1    | 9.315          | 9.465         | 10.435       | 0.008                 | <b>0.036</b>                | 2.300                  | UP           |
| MT-ND6   | 13.714         | 13.262        | 12.791       | 0.011                 | <b>0.035</b>                | -1.902                 | DOWN         |
| NHP2     | 7.803          | 8.034         | 8.413        | 0.013                 | <b>0.036</b>                | 1.520                  | UP           |
| SRM      | 7.273          | 7.429         | 7.761        | 0.019                 | <b>0.060</b>                | 1.440                  | UP           |
| MT1H     | 5.345          | 4.760         | 4.071        | 0.021                 | <b>0.035</b>                | -2.236                 | DOWN         |
| ODC1     | 7.747          | 8.723         | 8.643        | 0.021                 | <b>0.029</b>                | 1.767                  | UP           |
| GPHN     | 7.824          | 7.781         | 8.461        | 0.023                 | <b>0.060</b>                | 1.646                  | UP           |
| SAT1-002 | 6.361          | 7.195         | 7.177        | 0.028                 | <b>0.053</b>                | 1.855                  | UP           |
| TINF2    | 7.347          | 7.500         | 7.780        | 0.029                 | <b>0.070</b>                | 1.423                  | UP           |
| MTPAP    | 6.824          | 6.628         | 7.377        | 0.029                 | <b>0.046</b>                | 1.471                  | UP           |
| SAT1_all | 12.901         | 13.633        | 13.815       | 0.037                 | <b>0.053</b>                | 1.884                  | UP           |
| ACD      | 8.306          | 7.556         | 7.724        | 0.038                 | <b>0.072</b>                | -1.471                 | DOWN         |
| NFE2L2   | 9.360          | 9.712         | 10.001       | 0.045                 | <b>0.072</b>                | 1.578                  | UP           |
| NOP10    | 8.876          | 9.439         | 9.482        | 0.046                 | <b>0.053</b>                | 1.439                  | UP           |
| GRIN2B   | 4.063          | 3.722         | 3.368        | 0.047                 | <b>0.035</b>                | -1.579                 | DOWN         |

**Supplementary Table 7:** Blood differentially expressed genes between MDD-NS and Controls ( $P \leq 0.05$ )

| Gene   | Mean(Control) | Mean(MDD-NS) | Mean(MDD-S) | P (MDD-NS vs. Control) | Q Value (MDD-NS vs. Control) | FC (MDD-NS vs. Control) | FC Direction |
|--------|---------------|--------------|-------------|------------------------|------------------------------|-------------------------|--------------|
| TERC   | 11.089        | 10.318       | 10.666      | 0.013                  | 0.226                        | -1.637                  | DOWN         |
| ODC1   | 7.747         | 8.723        | 8.643       | 0.013                  | 0.226                        | 1.996                   | UP           |
| ACD    | 8.306         | 7.556        | 7.724       | 0.022                  | 0.226                        | -1.619                  | DOWN         |
| PMFBP1 | 5.426         | 4.690        | 4.781       | 0.042                  | 0.384                        | -1.657                  | DOWN         |

**Supplementary Table 8:** Blood differentially expressed genes between MDDs (regardless of the suicide status) and control groups ( $P \leq 0.05$ )

| Gene     | Mean(Control) | Mean(MDD-NS) | Mean(MDD-S) | P (MDD vs. Control) | Q Value (MDD vs. Control) | FC (MDD vs. Control) | FC Direction |
|----------|---------------|--------------|-------------|---------------------|---------------------------|----------------------|--------------|
| ODC1     | 7.747         | 8.723        | 8.643       | 0.007               | <b>0.070</b>              | 1.878                | UP           |
| ACD      | 8.306         | 7.556        | 7.724       | 0.013               | <b>0.103</b>              | -1.543               | DOWN         |
| POT1     | 6.624         | 6.886        | 7.403       | 0.013               | 0.117                     | 1.511                | UP           |
| EIF5A    | 9.528         | 9.873        | 10.272      | 0.013               | <b>0.103</b>              | 1.505                | UP           |
| TERC     | 11.089        | 10.318       | 10.666      | 0.019               | <b>0.103</b>              | -1.466               | DOWN         |
| HTR2A    | 3.361         | 2.843        | 2.209       | 0.024               | <b>0.103</b>              | -1.783               | DOWN         |
| MT-ND6   | 13.714        | 13.262       | 12.791      | 0.029               | <b>0.103</b>              | -1.664               | DOWN         |
| PMFBP1   | 5.426         | 4.690        | 4.781       | 0.032               | <b>0.103</b>              | -1.552               | DOWN         |
| SRM      | 7.273         | 7.429        | 7.761       | 0.038               | 0.191                     | 1.346                | UP           |
| MT1H     | 5.345         | 4.760        | 4.071       | 0.040               | <b>0.103</b>              | -1.929               | DOWN         |
| SAT1-002 | 6.361         | 7.195        | 7.177       | 0.040               | 0.124                     | 1.706                | UP           |
| NOP10    | 8.876         | 9.439        | 9.482       | 0.042               | <b>0.103</b>              | 1.412                | UP           |

**Supplementary Table 9:** DLPFC differentially expressed genes between MDD-S and Controls ( $P \leq 0.05$ )

| Gene     | Mean(Control) | Mean(MDD-NS) | Mean(MDD-S) | P (MDD-S vs. Control) | Q Value (MDD-S vs. Control) | FC (MDD-S vs. Control) | FC Direction |
|----------|---------------|--------------|-------------|-----------------------|-----------------------------|------------------------|--------------|
| SAT1_all | 11.418        | 11.521       | 11.156      | 0.007                 | <b>0.097</b>                | -1.210                 | DOWN         |
| CRY2     | 10.478        | 10.382       | 10.377      | 0.016                 | 0.397                       | -1.132                 | DOWN         |
| GABRA2   | 12.311        | 12.205       | 12.103      | 0.019                 | 0.198                       | -1.145                 | DOWN         |
| MT2A     | 10.793        | 11.094       | 10.515      | 0.032                 | 0.286                       | -1.307                 | DOWN         |
| MT1A     | 6.737         | 7.591        | 6.228       | 0.052                 | 0.417                       | -1.841                 | DOWN         |

**Supplementary Table 10:** DLPFC differentially expressed genes between MDD-NS and Controls ( $P \leq 0.05$ )

| Gene     | Mean(Control) | Mean(MDD-NS) | Mean(MDD-S) | P (MDD-NS vs. Control) | Q Value (MDD-NS vs. Control) | FC (MDD-NS vs. Control) | FC Direction |
|----------|---------------|--------------|-------------|------------------------|------------------------------|-------------------------|--------------|
| FKBP5    | 9.071         | 10.055       | 9.085       | 0.001                  | <b>0.015</b>                 | 1.675                   | UP           |
| ODC1     | 9.388         | 9.553        | 9.436       | 0.001                  | <b>0.101</b>                 | 1.149                   | UP           |
| SAT1-002 | 5.685         | 6.021        | 5.673       | 0.006                  | 0.121                        | 1.283                   | UP           |
| SMOX     | 9.355         | 9.551        | 9.444       | 0.009                  | 0.121                        | 1.164                   | UP           |
| RBFOX3   | 10.787        | 10.668       | 10.810      | 0.010                  | <b>0.101</b>                 | -1.087                  | DOWN         |
| MT3      | 14.289        | 14.453       | 14.185      | 0.011                  | 0.264                        | 1.151                   | UP           |
| HSD11B2  | 4.621         | 5.286        | 4.598       | 0.016                  | <b>0.015</b>                 | 1.353                   | UP           |
| AGMAT    | 6.415         | 6.128        | 6.430       | 0.016                  | 0.121                        | -1.215                  | DOWN         |
| GFAP     | 14.073        | 14.490       | 14.103      | 0.017                  | 0.264                        | 1.438                   | UP           |
| AMD1     | 12.012        | 12.083       | 11.998      | 0.035                  | 0.336                        | 1.099                   | UP           |
| MT1H     | 6.509         | 5.765        | 5.965       | 0.042                  | 0.179                        | -1.750                  | DOWN         |
| CRY2     | 10.478        | 10.382       | 10.377      | 0.045                  | 0.336                        | -1.111                  | DOWN         |
| PPARA    | 8.204         | 8.287        | 8.065       | 0.047                  | 0.480                        | 1.157                   | UP           |
| CRH      | 8.472         | 7.732        | 8.314       | 0.049                  | <b>0.015</b>                 | -1.310                  | DOWN         |

**Supplementary Table 11:** DLPFC differentially expressed genes between MDDs (regardless of the suicide status) and control groups ( $P \leq 0.05$ )

| Gene  | Mean(Control) | Mean(MDD-NS) | Mean(MDD-S) | P (MDD vs. Control) | Q Value (MDD vs. Control) | FC (MDD vs. Control) | FC Direction |
|-------|---------------|--------------|-------------|---------------------|---------------------------|----------------------|--------------|
| CRY2  | 10.478        | 10.382       | 10.377      | 0.013               | 0.548                     | -1.121               | DOWN         |
| SMOX  | 9.355         | 9.551        | 9.444       | 0.017               | 0.283                     | 1.127                | UP           |
| ODC1  | 9.388         | 9.553        | 9.436       | 0.017               | 0.283                     | 1.092                | UP           |
| FKBP5 | 9.071         | 10.055       | 9.085       | 0.037               | 0.283                     | 1.327                | UP           |

**Supplementary Figure 1:** Distribution of RNA Integrity Numbers (RIN) in both brain (DLPFC) and blood across the three diagnostic groups (Controls, MDD-S, and MDD-NS)

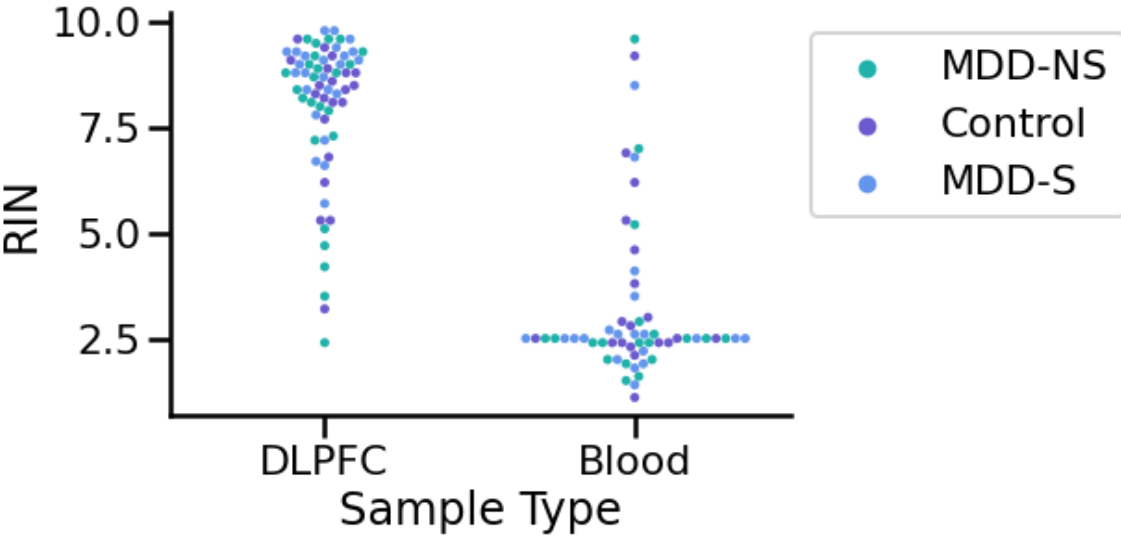

**Supplementary Figure 2:** Genes significantly differentially expressed, and concordant, between MDD-S and MDD-NS in blood and DLPFC. Two genes (SOX9 and PER3) are increased in suicides in both brain and blood. While two genes (CD19 and TERF1) are increased in blood, but decreased in DLPFC.

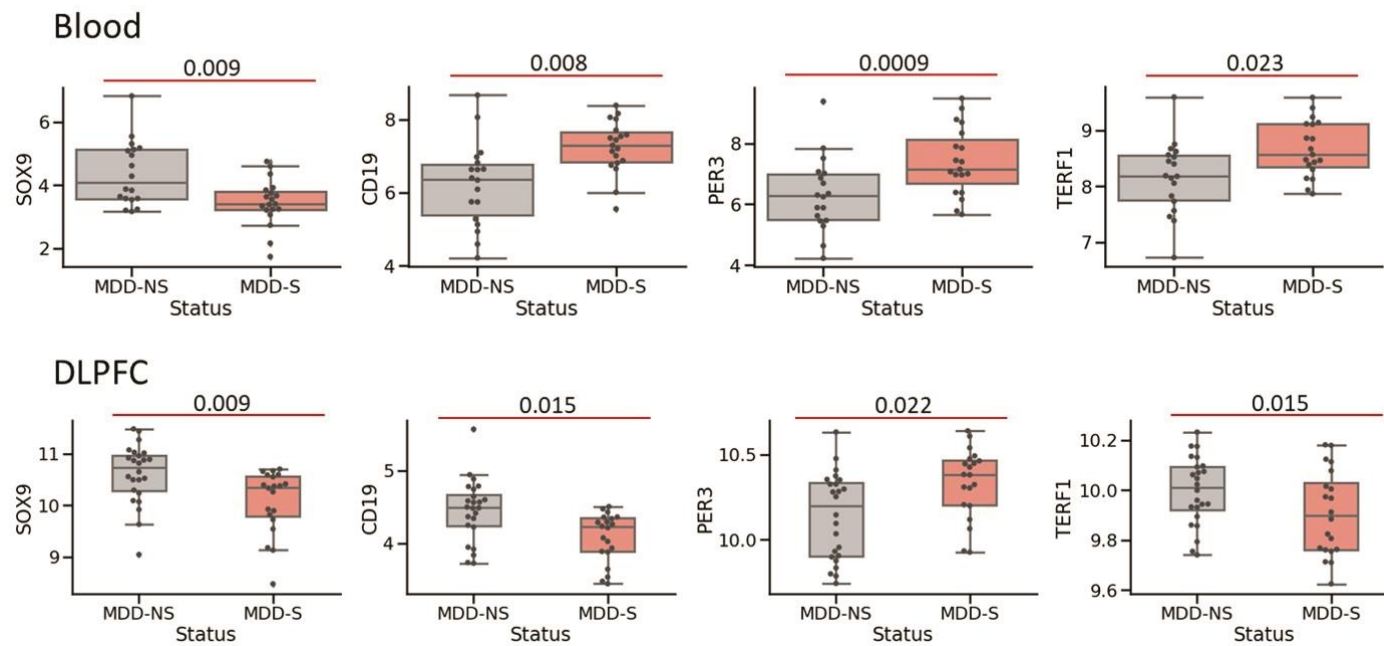

## Human Brain Dissection and Freezing Protocol

### **Ten-Step Process for Obtaining High Quality Brain Tissue (UCI/Pritzker Brain Bank)**

The brains are obtained from the Orange County Coroner's Offices with which the UCI Brain Bank has had long-standing and excellent relationships. The process involves collecting brains from schizophrenia (SZ), bipolar depressive disorder (BPD), major depressive disorder (MDD) patients, and control subjects with no psychiatric diagnoses.

1. UCI staff members identify potential brain donor candidates.
2. Prior to autopsy, all available clinical information (exclusion/inclusion criteria) is reviewed before contacting next-of-kin (NOK). The study is thoroughly explained, and consent is obtained and recorded by phone. Subsequently, the consent is obtained in writing.
3. Brain, blood, and skin are acquired during autopsy.
4. The whole brain is kept in an isotonic saline solution cooled by wet ice and taken to the UCI laboratory. Once in the lab the brain is imaged with a digital camera.
5. The brain is suspended in an alginate mold to securely hold the brain in place during slabbing. This greatly improves the consistency of slabbing so that specific brain regions are much better visualized. The brain is cortically sliced into ~12 1.5 cm slabs and each slab is digitally imaged before it is snap frozen in a -40°C dry ice cooled isopentane (2-methylbutane) bath. Brain slabs are then quickly vacuum-sealed to minimize ice crystal formation and stored in freezers in a heavily restricted area.
6. Each freezer is equipped with a sensaphone surveillance system, which automatically notifies research staff (24/7) whenever a freezer shows an increase in freezer temperature. Each freezer also has a liquid nitrogen back-up in case the freezer goes down. Finally, all freezers are individually monitored by research staff on a daily basis 365 days a year.

The brains are stored at -80°C while evaluations are undertaken. The evaluation process includes a psychological autopsy, examination by a neuropathologist. A small piece of cerebellum from each case is analyzed for pH and RNA Integrity Number (RIN), conducted at Mark Vawter's Functional Genomics Laboratory, thus providing important data for quality control.

7. The psychological autopsy process involves information and collection of all available medical records from doctors and hospitals, and an extensive phone interview with the NOK. The NOK interview includes 140 variables. Information from this interview and the medical records are reviewed to obtain a psychiatric diagnosis by a Ph.D. and an M.D.
8. While the psychological autopsy is being completed, the digital pictures of the brain taken at the initial slabbing are sent to a neuropathologist who evaluates them for brain pathology and generates a report.

9. All cases assigned for UCI/Pritzker cohorts must fulfill the following quality control criteria:

- a) Confirmed diagnosis
- b) Completed NOK interview
- c) Negative neuropathologist report
- d) Confirmed rapid death
- e) pH >6.5
- f) RIN value > 7.0

## References from Supplementary Table 2

1. Li, J. Z., B. G. Bunney, F. Meng, M. H. Hagenauer, D. M. Walsh, M. P. Vawter, S. J. Evans, P. V. Choudary, P. Cartagena, J. D. Barchas, A. F. Schatzberg, E. G. Jones, R. M. Myers, S. J. Watson, Jr., H. Akil and W. E. Bunney (2013). "Circadian patterns of gene expression in the human brain and disruption in major depressive disorder." *Proc Natl Acad Sci U S A* 110(24): 9950-9955.
2. Mamdani, F., B. Rollins, L. Morgan, R. M. Myers, J. D. Barchas, A. F. Schatzberg, S. J. Watson, H. Akil, S. G. Potkin, W. E. Bunney, M. P. Vawter and P. A. Sequeira (2015). "Variable telomere length across post-mortem human brain regions and specific reduction in the hippocampus of major depressive disorder." *Transl Psychiatry* 5: e636.
3. Mamdani, F., B. Rollins, L. Morgan, P. A. Sequeira and M. P. Vawter (2014). "The somatic common deletion in mitochondrial DNA is decreased in schizophrenia." *Schizophr Res* 159(2-3): 370-375.
4. elhem, N. M., S. Munroe, A. Marsland, K. Gray, D. Brent, G. Porta, A. Douaihy, M. L. Laudenslager, F. DePietro, R. Diler, H. Driscoll and P. Gopalan (2017). "Blunted HPA axis activity prior to suicide attempt and increased inflammation in attempters." *Psychoneuroendocrinology* 77: 284-294.
5. Melhuish Beaupre, L., G. M. Brown and J. L. Kennedy (2020). "Circadian genes in major depressive disorder." *World J Biol Psychiatry* 21(2): 80-90.
6. Nagy, C., M. Suderman, J. Yang, M. Szyf, N. Mechawar, C. Ernst and G. Turecki (2015). "Astrocytic abnormalities and global DNA methylation patterns in depression and suicide." *Mol Psychiatry* 20(3): 320-328.
7. Otsuka, I., T. Izumi, S. Boku, A. Kimura, Y. Zhang, K. Mouri, S. Okazaki, K. Shiroyiwa, M. Takahashi, Y. Ueno, O. Shirakawa, I. Sora and A. Hishimoto (2017). "Aberrant telomere length and mitochondrial DNA copy number in suicide completers." *Sci Rep* 7(1): 3176.
8. Pandey, G. N., H. S. Rizavi, H. Zhang, R. Bhaumik and X. Ren (2016). "The Expression of the Suicide-Associated Gene SKA2 Is Decreased in the Prefrontal Cortex of Suicide Victims but Not of Nonsuicidal Patients." *Int J Neuropsychopharmacol* 19(8).
9. Rice, C. and E. Skordalakes (2016). "Structure and function of the telomeric CST complex." *Comput Struct Biotechnol J* 14: 161-167.
10. Rollins, B., M. V. Martin, L. Morgan and M. P. Vawter (2010). "Analysis of whole genome biomarker expression in blood and brain." *Am J Med Genet B Neuropsychiatr Genet* 153b(4): 919-936.



11. Sequeira, A., F. G. Gwadry, J. M. Ffrench-Mullen, L. Canetti, Y. Gingras, R. A. Casero, Jr., G. Rouleau, C. Benkelfat and G. Turecki (2006). "Implication of SSAT by gene expression and genetic variation in suicide and major depression." *Arch Gen Psychiatry* 63(1): 35-48.
12. Sequeira, A., F. Mamdani, C. Ernst, M. P. Vawter, W. E. Bunney, V. Lebel, S. Rehal, T. Klempan, A. Gratton, C. Benkelfat, G. A. Rouleau, N. Mechawar and G. Turecki (2009). "Global brain gene expression analysis links glutamatergic and GABAergic alterations to suicide and major depression." *PLoS One* 4(8): e6585.
13. Sequeira, A., L. Morgan, D. M. Walsh, P. M. Cartagena, P. Choudary, J. Li, A. F. Schatzberg, S. J. Watson, H. Akil, R. M. Myers, E. G. Jones, W. E. Bunney and M. P. Vawter (2012). "Gene expression changes in the prefrontal cortex, anterior cingulate cortex and nucleus accumbens of mood disorders subjects that committed suicide." *PLoS One* 7(4): e35367.
14. Tomita, H., M. E. Ziegler, H. B. Kim, S. J. Evans, P. V. Choudary, J. Z. Li, F. Meng, M. Dai, R. M. Myers, C. R. Neal, T. P. Speed, J. D. Barchas, A. F. Schatzberg, S. J. Watson, H. Akil, E. G. Jones, W. E. Bunney and M. P. Vawter (2013). "G protein-linked signaling pathways in bipolar and major depressive disorders." *Front Genet* 4: 297.
15. Tonelli, L. H., J. Stiller, D. Rujescu, I. Giegling, B. Schneider, K. Maurer, A. Schnabel, H. J. Möller, H. H. Chen and T. T. Postolache (2008). "Elevated cytokine expression in the orbitofrontal cortex of victims of suicide." *Acta Psychiatr Scand* 117(3): 198-206.
16. Turecki, G., A. Sequeira, Y. Gingras, M. Séguin, A. Lesage, M. Tousignant, N. Chawky, C. Vanier, O. Lipp, C. Benkelfat and G. A. Rouleau (2003). "Suicide and serotonin: study of variation at seven serotonin receptor genes in suicide completers." *Am J Med Genet B Neuropsychiatr Genet* 118b(1): 36-40.
17. Yin, H., H. Galfalvy, S. P. Pantazatos, Y. Y. Huang, G. B. Rosoklija, A. J. Dwork, A. Burke, V. Arango, M. A. Oquendo and J. J. Mann (2016). "GLUCOCORTICOID RECEPTOR-RELATED GENES: GENOTYPE AND BRAIN GENE EXPRESSION RELATIONSHIPS TO SUICIDE AND MAJOR DEPRESSIVE DISORDER." *Depress Anxiety* 33(6): 531-540.
18. Yin, H., S. P. Pantazatos, H. Galfalvy, Y. Y. Huang, G. B. Rosoklija, A. J. Dwork, A. Burke, V. Arango, M. A. Oquendo and J. J. Mann (2016). "A pilot integrative genomics study of GABA and glutamate neurotransmitter systems in suicide, suicidal behavior, and major depressive disorder." *Am J Med Genet B Neuropsychiatr Genet* 171b(3): 414-426.
